# Supplementary material
Source: MDPI journal article supplement (https://www.mdpi.com/2076-3417/12/20/10262)
Supplement: s1 [file s1]

## EMBASE

|    |                                                                                                              |        |
|----|--------------------------------------------------------------------------------------------------------------|--------|
| 1  | 'transcranial magnetic stimulation'/exp                                                                      | 24,787 |
| 2  | (transcranial NEAR/1 'magnetic stimulation*'): ti, ab, de                                                    | 26,601 |
| 3  | ((('transcranial magnetic stimulation' OR tms)<br>NEAR/5 repetitive): ti, ab, de                             | 7,908  |
| 4  | ((('transcranial magnetic stimulation' OR tms)<br>NEAR/5 rhythmic): ti, ab, de                               | 65     |
| 5  | rtms: ti, ab, de OR tms: ti, ab, de                                                                          | 22,778 |
| 6  | ((repetitive OR 'single pulse' OR 'paired pulse')<br>NEAR/1 'transcranial magnetic stimulation'): ti, ab, de | 8,395  |
| 7  | #1 OR #2 OR #3 OR #4 OR #5 OR #6                                                                             | 33,851 |
| 8  | 'cocaine dependence'/exp                                                                                     | 12,959 |
| 9  | (cocaine* NEAR/2<br>(abuse* OR addict* OR dependen* OR disorder*)): ti, ab, de                               | 17,794 |
| 10 | #8 OR #9                                                                                                     | 17,794 |
| 11 | #7 AND #10                                                                                                   | 124    |

## WOS

|   |                                                                                                                                                                                                                                              |        |
|---|----------------------------------------------------------------------------------------------------------------------------------------------------------------------------------------------------------------------------------------------|--------|
| 1 | TS= (transcranial near/1 "magnetic stimulation*")<br>Índices=SCI-EXPANDED, SSCI, A&HCI, CPCI-S, CPCI-SSH,<br>BKCI-S, BKCI-SSH, ESCI, CCR-EXPANDED, IC Período de<br>tiempo=Todos los años                                                    | 22,942 |
| 2 | TS= (("transcranial magnetic stimulation" or<br>tms) near/5 repetitive)<br>Índices=SCI-EXPANDED, SSCI, A&HCI, CPCI-S, CPCI-SSH,<br>BKCI-S, BKCI-SSH, ESCI, CCR-EXPANDED, IC Período de<br>tiempo=Todos los años                              | 5,772  |
| 3 | TS= (("transcranial magnetic stimulation" or<br>tms) near/5 rhythmic)<br><i>Índices=SCI-EXPANDED, SSCI, A&amp;HCI, CPCI-S, CPCI-SSH,<br/>BKCI-S, BKCI-SSH, ESCI, CCR-EXPANDED, IC Período de<br/>tiempo=Todos los años</i>                   | 41     |
| 4 | TS= ((Repetitive or "single pulse" or "paired<br>pulse") near/1 "transcranial magnetic stimulation")<br>Índices=SCI-EXPANDED, SSCI, A&HCI, CPCI-S, CPCI-SSH,<br>BKCI-S, BKCI-SSH, ESCI, CCR-EXPANDED, IC Período de<br>tiempo=Todos los años | 6,106  |
| 5 | #4 OR #3 OR #1<br>Índices=SCI-EXPANDED, SSCI, A&HCI, CPCI-S, CPCI-SSH,<br>BKCI-S, BKCI-SSH, ESCI, CCR-EXPANDED, IC Período de<br>tiempo=Todos los años                                                                                       | 22,945 |

|   |                                                                                                                                                                                                       |        |
|---|-------------------------------------------------------------------------------------------------------------------------------------------------------------------------------------------------------|--------|
| 6 | TS= (cocaine* near/2 (abuse* or addict* or dependen* or disorder*))<br>Índices=SCI-EXPANDED, SSCI, A&HCI, CPCI-S, CPCI-SSH, BKCI-S, BKCI-SSH, ESCI, CCR-EXPANDED, IC Período de tiempo=Todos los años | 10,753 |
| 7 | #6 AND #5<br>Índices=SCI-EXPANDED, SSCI, A&HCI, CPCI-S, CPCI-SSH, BKCI-S, BKCI-SSH, ESCI, CCR-EXPANDED, IC Período de tiempo=Todos los años                                                           | 69     |
