# Supplementary material
Source: MDPI journal article supplement (https://www.mdpi.com/2076-3417/12/20/10262)
Supplement: s1 [file s1]

Archive with 4 entries (4 files):
- Supplementary Material Table S1.pdf
- Supplementary Material Table S2.pdf
- Supplementary Material Table S3.pdf
- Supplementary Material Table S4.pdf
