# Supplementary material
Source: MDPI journal article supplement (https://www.mdpi.com/2076-3417/12/20/10262)
Supplement: s1 [file s1 › Supplementary Material Table S3.pdf]

**Table S3. Ongoing studies about AP with dual release of insulin and pramlintide**

| <b>Title</b>                                                                                                                          | <b>Status</b> | <b>Code</b> | <b>Estimated Study Completion Date</b> |
|---------------------------------------------------------------------------------------------------------------------------------------|---------------|-------------|----------------------------------------|
| Co-administration of Pramlintide and Insulin Via an Automated Dual-hormone Artificial Pancreas System in Adults With Type 1 Diabetes. | Recruiting    | NCT04243629 | November, 2022                         |
| A Fully-closed Loop, Pramlintide and Insulin, Artificial Pancreas Clinical Trial for Adults with Type 1 Diabetes (FCL)                | Recruiting    | NCT05199714 | August, 2022                           |
