# Supplementary material
Source: MDPI journal article supplement (https://www.mdpi.com/2076-3417/12/20/10262)
Supplement: s1 [file s1 › Supplementary Material Table S4.pdf]

## Risk assessment of cross-over RCTs

|                                                                                                                                                                                                                                                                                                                                                                                                                                                                                                                                                                                                                                                                                                                                                                                                                                                                                                                                                                                                                                                                                                                                                                                                                                                                                                                                                                                                                                                                                                                                                                                                                                                                                                                                                                                                                                                                                                                                                                                                                                                                                                                                                                                                                                                                                    |                                                                                                                                                                                                                                                                                                       |                         |
|------------------------------------------------------------------------------------------------------------------------------------------------------------------------------------------------------------------------------------------------------------------------------------------------------------------------------------------------------------------------------------------------------------------------------------------------------------------------------------------------------------------------------------------------------------------------------------------------------------------------------------------------------------------------------------------------------------------------------------------------------------------------------------------------------------------------------------------------------------------------------------------------------------------------------------------------------------------------------------------------------------------------------------------------------------------------------------------------------------------------------------------------------------------------------------------------------------------------------------------------------------------------------------------------------------------------------------------------------------------------------------------------------------------------------------------------------------------------------------------------------------------------------------------------------------------------------------------------------------------------------------------------------------------------------------------------------------------------------------------------------------------------------------------------------------------------------------------------------------------------------------------------------------------------------------------------------------------------------------------------------------------------------------------------------------------------------------------------------------------------------------------------------------------------------------------------------------------------------------------------------------------------------------|-------------------------------------------------------------------------------------------------------------------------------------------------------------------------------------------------------------------------------------------------------------------------------------------------------|-------------------------|
| <b>Haidar (2020)</b>                                                                                                                                                                                                                                                                                                                                                                                                                                                                                                                                                                                                                                                                                                                                                                                                                                                                                                                                                                                                                                                                                                                                                                                                                                                                                                                                                                                                                                                                                                                                                                                                                                                                                                                                                                                                                                                                                                                                                                                                                                                                                                                                                                                                                                                               |                                                                                                                                                                                                                                                                                                       |                         |
| <p><b>Study design</b></p> <p> <input type="checkbox"/> Individually-randomized parallel-group trial<br/> <input type="checkbox"/> Cluster-randomized parallel-group trial<br/> <input checked="" type="checkbox"/> Individually randomized cross-over (or other matched) trial         </p> <p><b>Specify which outcome is being assessed for risk of bias:</b></p> <p>Specify the numerical result being assessed. In case of multiple alternative analyses being presented, specify the numeric result (e.g. RR = 1.52 (95% CI 0.83 to 2.77) and/or a reference (e.g. to a table, figure or paragraph) that uniquely defines the result being assessed.</p> <div style="border: 1px solid black; padding: 5px; width: fit-content; float: right;">Time in range: 3.9-10.0 mmol/L</div> <p><b>Is the review team's aim for this result...?</b></p> <p> <input checked="" type="checkbox"/> to assess the effect of <i>assignment to intervention</i> (the 'intention-to-treat' effect)<br/> <input type="checkbox"/> to assess the effect of <i>adhering to intervention</i> (the 'per-protocol' effect)         </p> <p><b>Which of the following sources were <u>obtained</u> to help inform the risk-of-bias assessment? (tick as many as apply)</b></p> <p> <input checked="" type="checkbox"/> Journal article(s) with results of the trial<br/> <input type="checkbox"/> Trial protocol<br/> <input type="checkbox"/> Statistical analysis plan (SAP)<br/> <input checked="" type="checkbox"/> Non-commercial trial registry record (e.g. ClinicalTrials.gov record)<br/> <input type="checkbox"/> Company-owned trial registry record (e.g. GSK Clinical Study Register record)<br/> <input type="checkbox"/> "Grey literature" (e.g. unpublished thesis)<br/> <input type="checkbox"/> Conference abstract(s) about the trial<br/> <input type="checkbox"/> Regulatory document (e.g. Clinical Study Report, Drug Approval Package)<br/> <input type="checkbox"/> Research ethics application<br/> <input type="checkbox"/> Grant database summary (e.g. NIH RePORTER or Research Councils UK Gateway to Research)<br/> <input type="checkbox"/> Personal communication with trialist<br/> <input type="checkbox"/> Personal communication with the sponsor         </p> |                                                                                                                                                                                                                                                                                                       |                         |
| <b>Domain 1: Risk of bias arising from the randomization process</b>                                                                                                                                                                                                                                                                                                                                                                                                                                                                                                                                                                                                                                                                                                                                                                                                                                                                                                                                                                                                                                                                                                                                                                                                                                                                                                                                                                                                                                                                                                                                                                                                                                                                                                                                                                                                                                                                                                                                                                                                                                                                                                                                                                                                               |                                                                                                                                                                                                                                                                                                       |                         |
| <b>Signalling questions</b>                                                                                                                                                                                                                                                                                                                                                                                                                                                                                                                                                                                                                                                                                                                                                                                                                                                                                                                                                                                                                                                                                                                                                                                                                                                                                                                                                                                                                                                                                                                                                                                                                                                                                                                                                                                                                                                                                                                                                                                                                                                                                                                                                                                                                                                        | <b>Comments</b>                                                                                                                                                                                                                                                                                       | <b>Response options</b> |
| 1.1 Was the allocation sequence random?                                                                                                                                                                                                                                                                                                                                                                                                                                                                                                                                                                                                                                                                                                                                                                                                                                                                                                                                                                                                                                                                                                                                                                                                                                                                                                                                                                                                                                                                                                                                                                                                                                                                                                                                                                                                                                                                                                                                                                                                                                                                                                                                                                                                                                            | "We used blocked randomization to generate allocation sequences" Pag. 598.                                                                                                                                                                                                                            | Yes                     |
| 1.2 Was the allocation sequence concealed until participants were enrolled and assigned to interventions?                                                                                                                                                                                                                                                                                                                                                                                                                                                                                                                                                                                                                                                                                                                                                                                                                                                                                                                                                                                                                                                                                                                                                                                                                                                                                                                                                                                                                                                                                                                                                                                                                                                                                                                                                                                                                                                                                                                                                                                                                                                                                                                                                                          | "which were disclose after the admission visit.."                                                                                                                                                                                                                                                     | Yes                     |
| 1.3 Did baseline differences between intervention groups suggest a problem with the randomization process?                                                                                                                                                                                                                                                                                                                                                                                                                                                                                                                                                                                                                                                                                                                                                                                                                                                                                                                                                                                                                                                                                                                                                                                                                                                                                                                                                                                                                                                                                                                                                                                                                                                                                                                                                                                                                                                                                                                                                                                                                                                                                                                                                                         |                                                                                                                                                                                                                                                                                                       | No information          |
| Risk-of-bias judgement                                                                                                                                                                                                                                                                                                                                                                                                                                                                                                                                                                                                                                                                                                                                                                                                                                                                                                                                                                                                                                                                                                                                                                                                                                                                                                                                                                                                                                                                                                                                                                                                                                                                                                                                                                                                                                                                                                                                                                                                                                                                                                                                                                                                                                                             |                                                                                                                                                                                                                                                                                                       | Low                     |
| <b>Domain S: S: Risk of bias arising from period and carryover effects in a crossover trial</b>                                                                                                                                                                                                                                                                                                                                                                                                                                                                                                                                                                                                                                                                                                                                                                                                                                                                                                                                                                                                                                                                                                                                                                                                                                                                                                                                                                                                                                                                                                                                                                                                                                                                                                                                                                                                                                                                                                                                                                                                                                                                                                                                                                                    |                                                                                                                                                                                                                                                                                                       |                         |
| S.1 Was the number of participants allocated to each of the two sequences equal or nearly equal?                                                                                                                                                                                                                                                                                                                                                                                                                                                                                                                                                                                                                                                                                                                                                                                                                                                                                                                                                                                                                                                                                                                                                                                                                                                                                                                                                                                                                                                                                                                                                                                                                                                                                                                                                                                                                                                                                                                                                                                                                                                                                                                                                                                   | The number of participants allocated in each sequence has been the same.                                                                                                                                                                                                                              | Yes                     |
| S.2 If N/PN/Ni to S.1: Were period effects accounted for in the analysis?                                                                                                                                                                                                                                                                                                                                                                                                                                                                                                                                                                                                                                                                                                                                                                                                                                                                                                                                                                                                                                                                                                                                                                                                                                                                                                                                                                                                                                                                                                                                                                                                                                                                                                                                                                                                                                                                                                                                                                                                                                                                                                                                                                                                          |                                                                                                                                                                                                                                                                                                       | No applicable           |
| S.3 Was there sufficient time for any carryover effects to have disappeared before outcome assessment in the second period?                                                                                                                                                                                                                                                                                                                                                                                                                                                                                                                                                                                                                                                                                                                                                                                                                                                                                                                                                                                                                                                                                                                                                                                                                                                                                                                                                                                                                                                                                                                                                                                                                                                                                                                                                                                                                                                                                                                                                                                                                                                                                                                                                        | A period of 21 days is left between each intervention.                                                                                                                                                                                                                                                | Probably yes            |
| Risk-of-bias judgement                                                                                                                                                                                                                                                                                                                                                                                                                                                                                                                                                                                                                                                                                                                                                                                                                                                                                                                                                                                                                                                                                                                                                                                                                                                                                                                                                                                                                                                                                                                                                                                                                                                                                                                                                                                                                                                                                                                                                                                                                                                                                                                                                                                                                                                             |                                                                                                                                                                                                                                                                                                       | Low                     |
| <b>Domain 2: Risk of bias due to deviations from the intended interventions (effect of assignment to intervention)</b>                                                                                                                                                                                                                                                                                                                                                                                                                                                                                                                                                                                                                                                                                                                                                                                                                                                                                                                                                                                                                                                                                                                                                                                                                                                                                                                                                                                                                                                                                                                                                                                                                                                                                                                                                                                                                                                                                                                                                                                                                                                                                                                                                             |                                                                                                                                                                                                                                                                                                       |                         |
| 2.1. Were participants aware of their assigned intervention during the trial?                                                                                                                                                                                                                                                                                                                                                                                                                                                                                                                                                                                                                                                                                                                                                                                                                                                                                                                                                                                                                                                                                                                                                                                                                                                                                                                                                                                                                                                                                                                                                                                                                                                                                                                                                                                                                                                                                                                                                                                                                                                                                                                                                                                                      | "Participants and investigators were not blinded to the allocation Pag. 598                                                                                                                                                                                                                           | Yes                     |
| 2.2. Were carers and people delivering the interventions aware of participants' assigned intervention during the trial?                                                                                                                                                                                                                                                                                                                                                                                                                                                                                                                                                                                                                                                                                                                                                                                                                                                                                                                                                                                                                                                                                                                                                                                                                                                                                                                                                                                                                                                                                                                                                                                                                                                                                                                                                                                                                                                                                                                                                                                                                                                                                                                                                            | They were supposed to know the allocation. "Study personnel delivered basal insulin and pramlintide manually by programming a new temporary basal every 10 min". Page. 598.                                                                                                                           | Yes                     |
| 2.3. If Y/PY/Ni to 2.1 or 2.2: Were there deviations from the intended intervention that arose because of the experimental context?                                                                                                                                                                                                                                                                                                                                                                                                                                                                                                                                                                                                                                                                                                                                                                                                                                                                                                                                                                                                                                                                                                                                                                                                                                                                                                                                                                                                                                                                                                                                                                                                                                                                                                                                                                                                                                                                                                                                                                                                                                                                                                                                                | There is no information to suggest that there were deviations from the initial allocation.                                                                                                                                                                                                            | Not information         |
| 2.4. If Y/PY to 2.3: Were these deviations from intended intervention balanced between groups?                                                                                                                                                                                                                                                                                                                                                                                                                                                                                                                                                                                                                                                                                                                                                                                                                                                                                                                                                                                                                                                                                                                                                                                                                                                                                                                                                                                                                                                                                                                                                                                                                                                                                                                                                                                                                                                                                                                                                                                                                                                                                                                                                                                     |                                                                                                                                                                                                                                                                                                       | No applicable           |
| 2.5 If N/PN/Ni to 2.4: Were these deviations likely to have affected the outcome?                                                                                                                                                                                                                                                                                                                                                                                                                                                                                                                                                                                                                                                                                                                                                                                                                                                                                                                                                                                                                                                                                                                                                                                                                                                                                                                                                                                                                                                                                                                                                                                                                                                                                                                                                                                                                                                                                                                                                                                                                                                                                                                                                                                                  |                                                                                                                                                                                                                                                                                                       | No applicable           |
| 2.6 Was an appropriate analysis used to estimate the effect of assignment to intervention?                                                                                                                                                                                                                                                                                                                                                                                                                                                                                                                                                                                                                                                                                                                                                                                                                                                                                                                                                                                                                                                                                                                                                                                                                                                                                                                                                                                                                                                                                                                                                                                                                                                                                                                                                                                                                                                                                                                                                                                                                                                                                                                                                                                         | "Our analyses were on a modified intention-to-treat basis. Participants who did not complete the rapid insulin-alone artificial pancreas intervention and at least one insulin-and-pramlintide intervention were not included in the analysis and were replaced in the enrollment process". Pag. 599. | Yes                     |

|                                                                                                                                                                                     |                                                                                                                                                                                 |                |
|-------------------------------------------------------------------------------------------------------------------------------------------------------------------------------------|---------------------------------------------------------------------------------------------------------------------------------------------------------------------------------|----------------|
| 2.7 If N/PN/NI to 2.6: Was there potential for a substantial impact (on the result) of the failure to analyse participants in the group to which they were randomized?              |                                                                                                                                                                                 | No applicable  |
| Risk-of-bias judgement                                                                                                                                                              |                                                                                                                                                                                 | Some concerns  |
| Domain 3: Missing outcome data                                                                                                                                                      |                                                                                                                                                                                 |                |
| 3.1 Were data for this outcome available for all, or nearly all, participants randomized?                                                                                           | Losses exceed 5% of data                                                                                                                                                        | Probably not   |
| 3.2 If N/PN/NI to 3.1: Is there evidence that the result was not biased by missing outcome data?                                                                                    |                                                                                                                                                                                 | Probably not   |
| 3.3 If N/PN to 3.2: Could missingness in the outcome depend on its true value?                                                                                                      |                                                                                                                                                                                 | Probably not   |
| 3.4 If Y/PY/NI to 3.3: Is it likely that missingness in the outcome depended on its true value?                                                                                     |                                                                                                                                                                                 | Not applicable |
| Risk-of-bias judgement                                                                                                                                                              |                                                                                                                                                                                 | Some concerns  |
| Domain 4: Risk of bias in measurement of the outcome                                                                                                                                |                                                                                                                                                                                 |                |
| 4.1 Was the method of measuring the outcome inappropriate?                                                                                                                          | The glucose profile is an appropriate method to determine the time in range of each of the interventions.                                                                       | Not            |
| 4.2 Could measurement or ascertainment of the outcome have differed between intervention groups?                                                                                    | There is no mention of differences in the procedure for assessing the outcome.                                                                                                  | Probably no    |
| 4.3 If N/PN/NI to 4.1 and 4.2: Were outcome assessors aware of the intervention received by study participants?                                                                     | It is likely that those who evaluated the results were aware of the assignment of the participants. "Participants and investigators were not blinded to the allocation Pag. 598 | Yes            |
| 4.4 If Y/PY/NI to 4.3: Could assessment of the outcome have been influenced by knowledge of intervention received?                                                                  | There is no evidence to suggest that the assessment of the outcome may have been influenced by knowledge of the assignment.                                                     | Not            |
| 4.5 If Y/PY/NI to 4.4: Is it likely that assessment of the outcome was influenced by knowledge of intervention received?                                                            |                                                                                                                                                                                 | No applicable  |
| Risk-of-bias judgement                                                                                                                                                              |                                                                                                                                                                                 | Low            |
| Domain 5: Risk of bias in selection of the reported result                                                                                                                          |                                                                                                                                                                                 |                |
| 5.1 Were the data that produced this result analysed in accordance with a pre-specified analysis plan that was finalized before unblinded outcome data were available for analysis? | NCT02814123.                                                                                                                                                                    | Yes            |
| Is the numerical result being assessed likely to have been selected, on the basis of the results, from...                                                                           |                                                                                                                                                                                 |                |
| 5.2. ... multiple outcome measurements (e.g. scales, definitions, time points) within the outcome domain?                                                                           | There is no evidence to suggest this.                                                                                                                                           | Probably not   |
| 5.3 ... multiple eligible analyses of the data?                                                                                                                                     | There is no evidence to suggest this.                                                                                                                                           | Probably no    |
| Risk-of-bias judgement                                                                                                                                                              |                                                                                                                                                                                 | Low            |
| Overall risk of bias                                                                                                                                                                |                                                                                                                                                                                 |                |
| Risk-of-bias judgement                                                                                                                                                              |                                                                                                                                                                                 | Some concerns  |

|                                                                                                                                                                                                                                                                                                                                                                                                                                                                                                                                                                                                                                                                                                                                                                                                                                                                                                                                                                                                                                                                                                                                                                                                                                                                         |  |
|-------------------------------------------------------------------------------------------------------------------------------------------------------------------------------------------------------------------------------------------------------------------------------------------------------------------------------------------------------------------------------------------------------------------------------------------------------------------------------------------------------------------------------------------------------------------------------------------------------------------------------------------------------------------------------------------------------------------------------------------------------------------------------------------------------------------------------------------------------------------------------------------------------------------------------------------------------------------------------------------------------------------------------------------------------------------------------------------------------------------------------------------------------------------------------------------------------------------------------------------------------------------------|--|
| Tsoukas (2021)                                                                                                                                                                                                                                                                                                                                                                                                                                                                                                                                                                                                                                                                                                                                                                                                                                                                                                                                                                                                                                                                                                                                                                                                                                                          |  |
| <p><b>Study design</b></p> <p><input type="checkbox"/> Individually-randomized parallel-group trial</p> <p><input type="checkbox"/> Cluster-randomized parallel-group trial</p> <p><input checked="" type="checkbox"/> Individually randomized cross-over (or other matched) trial</p> <p><b>Specify which outcome is being assessed for risk of bias:</b></p> <p>Specify the numerical result being assessed. In case of multiple alternative analyses being presented, specify the numeric result (e.g. RR = 1.52 (95% CI 0.83 to 2.77) and/or a reference (e.g. to a table, figure or paragraph) that uniquely defines the result being assessed.</p> <div style="border: 1px solid black; padding: 5px; width: fit-content;"> Time in range: 3·9–10·0 mmol/L (with a 6% non-inferiority margin). </div> <p><b>Is the review team's aim for this result...?</b></p> <p><input checked="" type="checkbox"/> to assess the effect of <i>assignment to intervention</i> (the 'intention-to-treat' effect)</p> <p><input type="checkbox"/> to assess the effect of <i>adhering to intervention</i> (the 'per-protocol' effect)</p> <p><b>Which of the following sources were <u>obtained</u> to help inform the risk-of-bias assessment? (tick as many as apply)</b></p> |  |

|                                                                                                                                                                               |                                                                                                                                                                         |                |
|-------------------------------------------------------------------------------------------------------------------------------------------------------------------------------|-------------------------------------------------------------------------------------------------------------------------------------------------------------------------|----------------|
| <input checked="" type="checkbox"/>                                                                                                                                           | Journal article(s) with results of the trial                                                                                                                            |                |
| <input type="checkbox"/>                                                                                                                                                      | Trial protocol                                                                                                                                                          |                |
| <input type="checkbox"/>                                                                                                                                                      | Statistical analysis plan (SAP)                                                                                                                                         |                |
| <input checked="" type="checkbox"/>                                                                                                                                           | Non-commercial trial registry record (e.g. ClinicalTrials.gov record)                                                                                                   |                |
| <input type="checkbox"/>                                                                                                                                                      | Company-owned trial registry record (e.g. GSK Clinical Study Register record)                                                                                           |                |
| <input type="checkbox"/>                                                                                                                                                      | "Grey literature" (e.g. unpublished thesis)                                                                                                                             |                |
| <input type="checkbox"/>                                                                                                                                                      | Conference abstract(s) about the trial                                                                                                                                  |                |
| <input type="checkbox"/>                                                                                                                                                      | Regulatory document (e.g. Clinical Study Report, Drug Approval Package)                                                                                                 |                |
| <input type="checkbox"/>                                                                                                                                                      | Research ethics application                                                                                                                                             |                |
| <input type="checkbox"/>                                                                                                                                                      | Grant database summary (e.g. NIH RePORTER or Research Councils UK Gateway to Research)                                                                                  |                |
| <input type="checkbox"/>                                                                                                                                                      | Personal communication with trialist                                                                                                                                    |                |
| <input type="checkbox"/>                                                                                                                                                      | Personal communication with the sponsor                                                                                                                                 |                |
| <b>Domain 1: Risk of bias arising from the randomization process</b>                                                                                                          |                                                                                                                                                                         |                |
| <b>Signalling questions</b>                                                                                                                                                   | <b>Comments</b>                                                                                                                                                         |                |
| <b>1.1 Was the allocation sequence random?</b>                                                                                                                                | "We used block randomisation (block size of four) for the allocation sequences, which were allocated by a computer after the completion of the admission visit". Pag 3. | Yes            |
| <b>1.2 Was the allocation sequence concealed until participants were enrolled and assigned to interventions?</b>                                                              | We used block randomisation (block size of four) for the allocation sequences, which were allocated by a computer after the completion of the admission visit". Pag 3.  | Yes            |
| <b>1.3 Did baseline differences between intervention groups suggest a problem with the randomization process?</b>                                                             | .                                                                                                                                                                       | No information |
| <b>Risk-of-bias judgement</b>                                                                                                                                                 |                                                                                                                                                                         | Low            |
| <b>Domain S: S: Risk of bias arising from period and carryover effects in a crossover trial</b>                                                                               |                                                                                                                                                                         |                |
| <b>S.1 Was the number of participants allocated to each of the two sequences equal or nearly equal?</b>                                                                       | The number of participants has been almost the same in the interventions.                                                                                               | Yes            |
| <b>S.2 If N/PN/NI to S.1: Were period effects accounted for in the analysis?</b>                                                                                              |                                                                                                                                                                         | No applicable  |
| <b>S.3 Was there sufficient time for any carryover effects to have disappeared before outcome assessment in the second period?</b>                                            | There is a period of 9 days between interventions                                                                                                                       | Probably yes   |
| <b>Risk-of-bias judgement</b>                                                                                                                                                 |                                                                                                                                                                         | Low            |
| <b>Domain 2: Risk of bias due to deviations from the intended interventions (effect of assignment to intervention)</b>                                                        |                                                                                                                                                                         |                |
| <b>2.1. Were participants aware of their assigned intervention during the trial?</b>                                                                                          | "Participants and investigators were not masked to the allocation because it was practically challenging to do so". Pag.3                                               | Yes            |
| <b>2.2. Were carers and people delivering the interventions aware of participants' assigned intervention during the trial?</b>                                                | It is expected, as it is an open label trial.                                                                                                                           | Yes            |
| <b>2.3. If Y/PY/NI to 2.1 or 2.2: Were there deviations from the intended intervention that arose because of the experimental context?</b>                                    | There is no information to suggest that there were deviations from the initial allocation.                                                                              | No information |
| <b>2.4. If Y/PY to 2.3: Were these deviations from intended intervention balanced between groups?</b>                                                                         |                                                                                                                                                                         | No applicable  |
| <b>2.5 If N/PN/NI to 2.4: Were these deviations likely to have affected the outcome?</b>                                                                                      |                                                                                                                                                                         | No applicable  |
| <b>2.6 Was an appropriate analysis used to estimate the effect of assignment to intervention?</b>                                                                             | The analysis to estimate the allocation effect seems appropriate.                                                                                                       | Probably yes   |
| <b>2.7 If N/PN/NI to 2.6: Was there potential for a substantial impact (on the result) of the failure to analyse participants in the group to which they were randomized?</b> |                                                                                                                                                                         | No applicable  |
| <b>Risk-of-bias judgement</b>                                                                                                                                                 |                                                                                                                                                                         | Some concerns  |
| <b>Domain 3: Missing outcome data</b>                                                                                                                                         |                                                                                                                                                                         |                |
| <b>3.1 Were data for this outcome available for all, or nearly all, participants randomized?</b>                                                                              | Data were available for almost all randomised participants.                                                                                                             | Yes            |
| <b>3.2 If N/PN/NI to 3.1: Is there evidence that the result was not biased by missing outcome data?</b>                                                                       |                                                                                                                                                                         | No applicable  |
| <b>3.3 If N/PN to 3.2: Could missingness in the outcome depend on its true value?</b>                                                                                         |                                                                                                                                                                         | No applicable  |
| <b>3.4 If Y/PY/NI to 3.3: Is it likely that missingness in the outcome depended on its true value?</b>                                                                        |                                                                                                                                                                         | No applicable  |
| <b>Risk-of-bias judgement</b>                                                                                                                                                 |                                                                                                                                                                         | Low            |
| <b>Domain 4: Risk of bias in measurement of the outcome</b>                                                                                                                   |                                                                                                                                                                         |                |

|                                                                                                                                                                                            |                                                                                                                                                                                  |               |
|--------------------------------------------------------------------------------------------------------------------------------------------------------------------------------------------|----------------------------------------------------------------------------------------------------------------------------------------------------------------------------------|---------------|
| <b>4.1 Was the method of measuring the outcome inappropriate?</b>                                                                                                                          | The glucose profile is an appropriate method to determine the time in range of each of the interventions.                                                                        | Not           |
| <b>4.2 Could measurement or ascertainment of the outcome have differed between intervention groups?</b>                                                                                    | There is no mention of differences in the procedure for assessing the outcome.                                                                                                   | Probably no   |
| <b>4.3 If N/PN/Ni to 4.1 and 4.2: Were outcome assessors aware of the intervention received by study participants?</b>                                                                     | It is likely that those who evaluated the results were aware of the assignment of the participants. "Participants and investigators were not blinded to the allocation" Pag. 598 | Yes           |
| <b>4.4 If Y/PY/Ni to 4.3: Could assessment of the outcome have been influenced by knowledge of intervention received?</b>                                                                  | There is no evidence to suggest that the assessment of the outcome may have been influenced by knowledge of the assignment.                                                      | Probably no   |
| <b>4.5 If Y/PY/Ni to 4.4: Is it likely that assessment of the outcome was influenced by knowledge of intervention received?</b>                                                            |                                                                                                                                                                                  | No applicable |
| <b>Risk-of-bias judgement</b>                                                                                                                                                              |                                                                                                                                                                                  | Low           |
| <b>Domain 5: Risk of bias in selection of the reported result</b>                                                                                                                          |                                                                                                                                                                                  |               |
| <b>5.1 Were the data that produced this result analysed in accordance with a pre-specified analysis plan that was finalized before unblinded outcome data were available for analysis?</b> | NCT03800875                                                                                                                                                                      | Yes           |
| <b>Is the numerical result being assessed likely to have been selected, on the basis of the results, from...</b>                                                                           |                                                                                                                                                                                  |               |
| <b>5.2. ... multiple outcome measurements (e.g. scales, definitions, time points) within the outcome domain?</b>                                                                           | NCT03800875                                                                                                                                                                      | Probably not  |
| <b>5.3 ... multiple eligible analyses of the data?</b>                                                                                                                                     | NCT03800875                                                                                                                                                                      | Probably not  |
| <b>Risk-of-bias judgement</b>                                                                                                                                                              |                                                                                                                                                                                  | Low           |
| <b>Overall risk of bias</b>                                                                                                                                                                |                                                                                                                                                                                  |               |
| <b>Risk-of-bias judgement</b>                                                                                                                                                              |                                                                                                                                                                                  | Some concerns |

|                                                                                                                                                                                     |                                                                                                                                                                |                |
|-------------------------------------------------------------------------------------------------------------------------------------------------------------------------------------|----------------------------------------------------------------------------------------------------------------------------------------------------------------|----------------|
| 1.2 Was the allocation sequence concealed until participants were enrolled and assigned to interventions?                                                                           |                                                                                                                                                                | No information |
| 1.3 Did baseline differences between intervention groups suggest a problem with the randomization process?                                                                          | There are no data to suggest a problem with randomisation                                                                                                      | No information |
| Risk-of-bias judgement                                                                                                                                                              |                                                                                                                                                                | Some concerns  |
| <b>Domain S: S: Risk of bias arising from period and carryover effects in a crossover trial</b>                                                                                     |                                                                                                                                                                |                |
| S.1 Was the number of participants allocated to each of the two sequences equal or nearly equal?                                                                                    | The allocation of participants is expected to have been the same.                                                                                              | No information |
| S.2 If N/PN/NI to S.1: Were period effects accounted for in the analysis?                                                                                                           |                                                                                                                                                                | No information |
| S.3 Was there sufficient time for any carryover effects to have disappeared before outcome assessment in the second period?                                                         | There was a 14-45-day washout period between each intervention to cognitively separate the arms for qualitative assessment. Pag. 2092                          | Yes            |
| Risk-of-bias judgement                                                                                                                                                              |                                                                                                                                                                | Some concerns  |
| <b>Domain 2: Risk of bias due to deviations from the intended interventions (effect of assignment to intervention)</b>                                                              |                                                                                                                                                                |                |
| 2.1. Were participants aware of their assigned intervention during the trial?                                                                                                       | "This was necessary to mask participants and research staff to the study drug in the interventions with SMA"                                                   | Probably not   |
| 2.2. Were carers and people delivering the interventions aware of participants' assigned intervention during the trial?                                                             | This was necessary to mask participants and research staff to the study drug in the interventions with SMA                                                     | Probably not   |
| 2.3. If Y/PY/NI to 2.1 or 2.2: Were there deviations from the intended intervention that arose because of the experimental context?                                                 |                                                                                                                                                                | No applicable  |
| 2.4. If Y/PY to 2.3: Were these deviations from intended intervention balanced between groups?                                                                                      |                                                                                                                                                                | No applicable  |
| 2.5 If N/PN/NI to 2.4: Were these deviations likely to have affected the outcome?                                                                                                   |                                                                                                                                                                | No applicable  |
| 2.6 Was an appropriate analysis used to estimate the effect of assignment to intervention?                                                                                          | The analysis is appropriate                                                                                                                                    | Probably yes   |
| 2.7 If N/PN/NI to 2.6: Was there potential for a substantial impact (on the result) of the failure to analyse participants in the group to which they were randomized?              |                                                                                                                                                                | No applicable  |
| Risk-of-bias judgement                                                                                                                                                              |                                                                                                                                                                | Low            |
| <b>Domain 3: Missing outcome data</b>                                                                                                                                               |                                                                                                                                                                |                |
| 3.1 Were data for this outcome available for all, or nearly all, participants randomized?                                                                                           | Data were available for all participants.                                                                                                                      | Yes            |
| 3.2 If N/PN/NI to 3.1: Is there evidence that the result was not biased by missing outcome data?                                                                                    |                                                                                                                                                                | No applicable  |
| 3.3 If N/PN to 3.2: Could missingness in the outcome depend on its true value?                                                                                                      |                                                                                                                                                                | No applicable  |
| 3.4 If Y/PY/NI to 3.3: Is it likely that missingness in the outcome depended on its true value?                                                                                     |                                                                                                                                                                | No applicable  |
| Risk-of-bias judgement                                                                                                                                                              |                                                                                                                                                                | Low            |
| <b>Domain 4: Risk of bias in measurement of the outcome</b>                                                                                                                         |                                                                                                                                                                |                |
| 4.1 Was the method of measuring the outcome inappropriate?                                                                                                                          | The glucose profile is an appropriate method to determine the time in range of each of the interventions.                                                      | Not            |
| 4.2 Could measurement or ascertainment of the outcome have differed between intervention groups?                                                                                    | There is no mention of differences in the procedure for assessing the outcome.                                                                                 | Probably not   |
| 4.3 If N/PN/NI to 4.1 and 4.2: Were outcome assessors aware of the intervention received by study participants?                                                                     | It is likely that those who evaluated the results were unaware of the allocation of participants, as the researchers were blinded in the allocation procedure. | Not            |
| 4.4 If Y/PY/NI to 4.3: Could assessment of the outcome have been influenced by knowledge of intervention received?                                                                  |                                                                                                                                                                | No applicable  |
| 4.5 If Y/PY/NI to 4.4: Is it likely that assessment of the outcome was influenced by knowledge of intervention received?                                                            |                                                                                                                                                                | No applicable  |
| Risk-of-bias judgement                                                                                                                                                              |                                                                                                                                                                | Low            |
| <b>Domain 5: Risk of bias in selection of the reported result</b>                                                                                                                   |                                                                                                                                                                |                |
| 5.1 Were the data that produced this result analysed in accordance with a pre-specified analysis plan that was finalized before unblinded outcome data were available for analysis? | "We performed an eight-participant inpatient feasibility study, and a four-participant outpatient pilot study internal to a larger, main trial.                | Yes            |

|                                                                                                           |                                                                                                                                            |               |
|-----------------------------------------------------------------------------------------------------------|--------------------------------------------------------------------------------------------------------------------------------------------|---------------|
|                                                                                                           | The feasibility and main outpatient studies are registered with ClinicalTrials.gov (NCT03993366 and NCT04163874, respectively)". Pag. 2091 |               |
| Is the numerical result being assessed likely to have been selected, on the basis of the results, from... |                                                                                                                                            |               |
| 5.2. ... multiple outcome measurements (e.g. scales, definitions, time points) within the outcome domain? | There is no data to suggest that multiple assessments were made.                                                                           | Not           |
| 5.3 ... multiple eligible analyses of the data?                                                           | There is no evidence to suggest that multiple analyses were carried out.                                                                   | Not           |
| Risk-of-bias judgement                                                                                    |                                                                                                                                            | Low           |
| Overall risk of bias                                                                                      |                                                                                                                                            |               |
| Risk-of-bias judgement                                                                                    |                                                                                                                                            | Some concerns |

|                                                                                                                                                                                                                                                                                                                                                                                                                                                                                                                                                                                                                                                                                                                                                                                                                                                                                                                                                                                                                                                                                                                                                                                                                                                                                                                                                                                                                                                                                                                                                                                                                                                                                                                                                                                                                                                                                                                                                                                                                                                                                                                                                                                                                                                                                                                                                                                                                                                                                                                                                                                                                                                                                                                                                                                                                                                                                                                                                                                                                                                                                                                                                                                                                                                                                                                                                                                                                                                                                                                                                                                                                                                           |                                                                                                                                                                    |                         |
|-----------------------------------------------------------------------------------------------------------------------------------------------------------------------------------------------------------------------------------------------------------------------------------------------------------------------------------------------------------------------------------------------------------------------------------------------------------------------------------------------------------------------------------------------------------------------------------------------------------------------------------------------------------------------------------------------------------------------------------------------------------------------------------------------------------------------------------------------------------------------------------------------------------------------------------------------------------------------------------------------------------------------------------------------------------------------------------------------------------------------------------------------------------------------------------------------------------------------------------------------------------------------------------------------------------------------------------------------------------------------------------------------------------------------------------------------------------------------------------------------------------------------------------------------------------------------------------------------------------------------------------------------------------------------------------------------------------------------------------------------------------------------------------------------------------------------------------------------------------------------------------------------------------------------------------------------------------------------------------------------------------------------------------------------------------------------------------------------------------------------------------------------------------------------------------------------------------------------------------------------------------------------------------------------------------------------------------------------------------------------------------------------------------------------------------------------------------------------------------------------------------------------------------------------------------------------------------------------------------------------------------------------------------------------------------------------------------------------------------------------------------------------------------------------------------------------------------------------------------------------------------------------------------------------------------------------------------------------------------------------------------------------------------------------------------------------------------------------------------------------------------------------------------------------------------------------------------------------------------------------------------------------------------------------------------------------------------------------------------------------------------------------------------------------------------------------------------------------------------------------------------------------------------------------------------------------------------------------------------------------------------------------------------|--------------------------------------------------------------------------------------------------------------------------------------------------------------------|-------------------------|
| <b>Estudio: Tsoukas (2021) Feasibility study</b>                                                                                                                                                                                                                                                                                                                                                                                                                                                                                                                                                                                                                                                                                                                                                                                                                                                                                                                                                                                                                                                                                                                                                                                                                                                                                                                                                                                                                                                                                                                                                                                                                                                                                                                                                                                                                                                                                                                                                                                                                                                                                                                                                                                                                                                                                                                                                                                                                                                                                                                                                                                                                                                                                                                                                                                                                                                                                                                                                                                                                                                                                                                                                                                                                                                                                                                                                                                                                                                                                                                                                                                                          |                                                                                                                                                                    |                         |
| <p><b>Study design</b></p> <div style="display: flex; align-items: flex-start;"> <div style="margin-right: 10px;"> <input type="checkbox"/> Individually-randomized parallel-group trial<br/> <input type="checkbox"/> Cluster-randomized parallel-group trial<br/> <input checked="" type="checkbox"/> Individually randomized cross-over (or other matched) trial         </div> </div> <p><b>Specify which outcome is being assessed for risk of bias:</b></p> <div style="display: flex; justify-content: space-between; margin-top: 10px;"> <div style="width: 60%;"> <p>Specify the numerical result being assessed. In case of multiple alternative analyses being presented, specify the numeric result (e.g. RR = 1.52 (95% CI 0.83 to 2.77) and/or a reference (e.g. to a table, figure or paragraph) that uniquely defines the result being assessed.</p> </div> <div style="width: 35%; border: 1px solid black; padding: 5px;"> <p>Time in range: 3.9-10 mmol/L</p> </div> </div> <p><b>Is the review team's aim for this result...?</b></p> <div style="display: flex; margin-top: 5px;"> <input checked="" type="checkbox"/> to assess the effect of <i>assignment to intervention</i> (the 'intention-to-treat' effect)<br/> <input type="checkbox"/> to assess the effect of <i>adhering to intervention</i> (the 'per-protocol' effect)     </div> <p><b>Which of the following sources were <u>obtained</u> to help inform the risk-of-bias assessment? (tick as many as apply)</b></p> <div style="margin-top: 5px;"> <div style="display: flex; margin-bottom: 2px;"> <input checked="" type="checkbox"/> <div style="margin-left: 5px;">Journal article(s) with results of the trial</div> </div> <div style="display: flex; margin-bottom: 2px;"> <input type="checkbox"/> <div style="margin-left: 5px;">Trial protocol</div> </div> <div style="display: flex; margin-bottom: 2px;"> <input type="checkbox"/> <div style="margin-left: 5px;">Statistical analysis plan (SAP)</div> </div> <div style="display: flex; margin-bottom: 2px;"> <input checked="" type="checkbox"/> <div style="margin-left: 5px;">Non-commercial trial registry record (e.g. ClinicalTrials.gov record)</div> </div> <div style="display: flex; margin-bottom: 2px;"> <input type="checkbox"/> <div style="margin-left: 5px;">Company-owned trial registry record (e.g. GSK Clinical Study Register record)</div> </div> <div style="display: flex; margin-bottom: 2px;"> <input type="checkbox"/> <div style="margin-left: 5px;">"Grey literature" (e.g. unpublished thesis)</div> </div> <div style="display: flex; margin-bottom: 2px;"> <input type="checkbox"/> <div style="margin-left: 5px;">Conference abstract(s) about the trial</div> </div> <div style="display: flex; margin-bottom: 2px;"> <input type="checkbox"/> <div style="margin-left: 5px;">Regulatory document (e.g. Clinical Study Report, Drug Approval Package)</div> </div> <div style="display: flex; margin-bottom: 2px;"> <input type="checkbox"/> <div style="margin-left: 5px;">Research ethics application</div> </div> <div style="display: flex; margin-bottom: 2px;"> <input type="checkbox"/> <div style="margin-left: 5px;">Grant database summary (e.g. NIH RePORTER or Research Councils UK Gateway to Research)</div> </div> <div style="display: flex; margin-bottom: 2px;"> <input type="checkbox"/> <div style="margin-left: 5px;">Personal communication with trialist</div> </div> <div style="display: flex; margin-bottom: 2px;"> <input type="checkbox"/> <div style="margin-left: 5px;">Personal communication with the sponsor</div> </div> </div> |                                                                                                                                                                    |                         |
| <b>Domain 1: Risk of bias arising from the randomization process</b>                                                                                                                                                                                                                                                                                                                                                                                                                                                                                                                                                                                                                                                                                                                                                                                                                                                                                                                                                                                                                                                                                                                                                                                                                                                                                                                                                                                                                                                                                                                                                                                                                                                                                                                                                                                                                                                                                                                                                                                                                                                                                                                                                                                                                                                                                                                                                                                                                                                                                                                                                                                                                                                                                                                                                                                                                                                                                                                                                                                                                                                                                                                                                                                                                                                                                                                                                                                                                                                                                                                                                                                      |                                                                                                                                                                    |                         |
| <b>Signalling questions</b>                                                                                                                                                                                                                                                                                                                                                                                                                                                                                                                                                                                                                                                                                                                                                                                                                                                                                                                                                                                                                                                                                                                                                                                                                                                                                                                                                                                                                                                                                                                                                                                                                                                                                                                                                                                                                                                                                                                                                                                                                                                                                                                                                                                                                                                                                                                                                                                                                                                                                                                                                                                                                                                                                                                                                                                                                                                                                                                                                                                                                                                                                                                                                                                                                                                                                                                                                                                                                                                                                                                                                                                                                               | <b>Comments</b>                                                                                                                                                    | <b>Response options</b> |
| <b>1.1 Was the allocation sequence random?</b>                                                                                                                                                                                                                                                                                                                                                                                                                                                                                                                                                                                                                                                                                                                                                                                                                                                                                                                                                                                                                                                                                                                                                                                                                                                                                                                                                                                                                                                                                                                                                                                                                                                                                                                                                                                                                                                                                                                                                                                                                                                                                                                                                                                                                                                                                                                                                                                                                                                                                                                                                                                                                                                                                                                                                                                                                                                                                                                                                                                                                                                                                                                                                                                                                                                                                                                                                                                                                                                                                                                                                                                                            |                                                                                                                                                                    | No information          |
| <b>1.2 Was the allocation sequence concealed until participants were enrolled and assigned to interventions?</b>                                                                                                                                                                                                                                                                                                                                                                                                                                                                                                                                                                                                                                                                                                                                                                                                                                                                                                                                                                                                                                                                                                                                                                                                                                                                                                                                                                                                                                                                                                                                                                                                                                                                                                                                                                                                                                                                                                                                                                                                                                                                                                                                                                                                                                                                                                                                                                                                                                                                                                                                                                                                                                                                                                                                                                                                                                                                                                                                                                                                                                                                                                                                                                                                                                                                                                                                                                                                                                                                                                                                          |                                                                                                                                                                    | No information          |
| <b>1.3 Did baseline differences between intervention groups suggest a problem with the randomization process?</b>                                                                                                                                                                                                                                                                                                                                                                                                                                                                                                                                                                                                                                                                                                                                                                                                                                                                                                                                                                                                                                                                                                                                                                                                                                                                                                                                                                                                                                                                                                                                                                                                                                                                                                                                                                                                                                                                                                                                                                                                                                                                                                                                                                                                                                                                                                                                                                                                                                                                                                                                                                                                                                                                                                                                                                                                                                                                                                                                                                                                                                                                                                                                                                                                                                                                                                                                                                                                                                                                                                                                         | There are no data to suggest a problem with randomisation.                                                                                                         | No information          |
| <b>Risk-of-bias judgement</b>                                                                                                                                                                                                                                                                                                                                                                                                                                                                                                                                                                                                                                                                                                                                                                                                                                                                                                                                                                                                                                                                                                                                                                                                                                                                                                                                                                                                                                                                                                                                                                                                                                                                                                                                                                                                                                                                                                                                                                                                                                                                                                                                                                                                                                                                                                                                                                                                                                                                                                                                                                                                                                                                                                                                                                                                                                                                                                                                                                                                                                                                                                                                                                                                                                                                                                                                                                                                                                                                                                                                                                                                                             |                                                                                                                                                                    | Some concerns           |
| <b>Domain S: S: Risk of bias arising from period and carryover effects in a crossover trial</b>                                                                                                                                                                                                                                                                                                                                                                                                                                                                                                                                                                                                                                                                                                                                                                                                                                                                                                                                                                                                                                                                                                                                                                                                                                                                                                                                                                                                                                                                                                                                                                                                                                                                                                                                                                                                                                                                                                                                                                                                                                                                                                                                                                                                                                                                                                                                                                                                                                                                                                                                                                                                                                                                                                                                                                                                                                                                                                                                                                                                                                                                                                                                                                                                                                                                                                                                                                                                                                                                                                                                                           |                                                                                                                                                                    |                         |
| <b>S.1 Was the number of participants allocated to each of the two sequences equal or nearly equal?</b>                                                                                                                                                                                                                                                                                                                                                                                                                                                                                                                                                                                                                                                                                                                                                                                                                                                                                                                                                                                                                                                                                                                                                                                                                                                                                                                                                                                                                                                                                                                                                                                                                                                                                                                                                                                                                                                                                                                                                                                                                                                                                                                                                                                                                                                                                                                                                                                                                                                                                                                                                                                                                                                                                                                                                                                                                                                                                                                                                                                                                                                                                                                                                                                                                                                                                                                                                                                                                                                                                                                                                   | The allocation of participants is expected to have been the same.                                                                                                  | No information          |
| <b>S.2 If N/PN/NI to S.1: Were period effects accounted for in the analysis?</b>                                                                                                                                                                                                                                                                                                                                                                                                                                                                                                                                                                                                                                                                                                                                                                                                                                                                                                                                                                                                                                                                                                                                                                                                                                                                                                                                                                                                                                                                                                                                                                                                                                                                                                                                                                                                                                                                                                                                                                                                                                                                                                                                                                                                                                                                                                                                                                                                                                                                                                                                                                                                                                                                                                                                                                                                                                                                                                                                                                                                                                                                                                                                                                                                                                                                                                                                                                                                                                                                                                                                                                          |                                                                                                                                                                    | No information          |
| <b>S.3 Was there sufficient time for any carryover effects to have disappeared before outcome assessment in the second period?</b>                                                                                                                                                                                                                                                                                                                                                                                                                                                                                                                                                                                                                                                                                                                                                                                                                                                                                                                                                                                                                                                                                                                                                                                                                                                                                                                                                                                                                                                                                                                                                                                                                                                                                                                                                                                                                                                                                                                                                                                                                                                                                                                                                                                                                                                                                                                                                                                                                                                                                                                                                                                                                                                                                                                                                                                                                                                                                                                                                                                                                                                                                                                                                                                                                                                                                                                                                                                                                                                                                                                        | "Each 24-hour closed-loop intervention was preceded by a 3-day, at-home, run-in period, during which participants used the study medications on open-loop therapy, | Probably yes            |

|                                                                                                                                                                        |                                                                                                                                                                                                                                        |                 |
|------------------------------------------------------------------------------------------------------------------------------------------------------------------------|----------------------------------------------------------------------------------------------------------------------------------------------------------------------------------------------------------------------------------------|-----------------|
|                                                                                                                                                                        | with carbohydrate counting". Pg. 2092.                                                                                                                                                                                                 |                 |
| Risk-of-bias judgement                                                                                                                                                 |                                                                                                                                                                                                                                        | Some concerns   |
| <b>Domain 2: Risk of bias due to deviations from the intended interventions (effect of assignment to intervention)</b>                                                 |                                                                                                                                                                                                                                        |                 |
| 2.1. Were participants aware of their assigned intervention during the trial?                                                                                          | During the interventions, every 10 minutes a member of the research staff entered glucose sensor readings into a laptop that ran the dosing algorithms, recommending adjusted basal rates that were manually programed into the pumps. | Probably not    |
| 2.2. Were carers and people delivering the interventions aware of participants' assigned intervention during the trial?                                                |                                                                                                                                                                                                                                        | No information  |
| 2.3. If Y/PY/NI to 2.1 or 2.2: Were there deviations from the intended intervention that arose because of the experimental context?                                    |                                                                                                                                                                                                                                        | No information  |
| 2.4. If Y/PY to 2.3: Were these deviations from intended intervention balanced between groups?                                                                         |                                                                                                                                                                                                                                        | No applicable   |
| 2.5 If N/PN/NI to 2.4: Were these deviations likely to have affected the outcome?                                                                                      |                                                                                                                                                                                                                                        | No applicable   |
| 2.6 Was an appropriate analysis used to estimate the effect of assignment to intervention?                                                                             |                                                                                                                                                                                                                                        | Probably yes    |
| 2.7 If N/PN/NI to 2.6: Was there potential for a substantial impact (on the result) of the failure to analyse participants in the group to which they were randomized? |                                                                                                                                                                                                                                        | No applicable   |
| Risk-of-bias judgement                                                                                                                                                 |                                                                                                                                                                                                                                        | Some concerns   |
| <b>Domain 3: Missing outcome data</b>                                                                                                                                  |                                                                                                                                                                                                                                        |                 |
| 3.1 Were data for this outcome available for all, or nearly all, participants randomized?                                                                              | Data were available for all participants.                                                                                                                                                                                              | Yes             |
| 3.2 If N/PN/NI to 3.1: Is there evidence that the result was not biased by missing outcome data?                                                                       |                                                                                                                                                                                                                                        | No applicable   |
| 3.3 If N/PN to 3.2: Could missingness in the outcome depend on its true value?                                                                                         |                                                                                                                                                                                                                                        | No applicable   |
| 3.4 If Y/PY/NI to 3.3: Is it likely that missingness in the outcome depended on its true value?                                                                        |                                                                                                                                                                                                                                        | No applicable   |
| Risk-of-bias judgement                                                                                                                                                 |                                                                                                                                                                                                                                        | Low             |
| <b>Domain 4: Risk of bias in measurement of the outcome</b>                                                                                                            |                                                                                                                                                                                                                                        |                 |
| 4.1 Was the method of measuring the outcome inappropriate?                                                                                                             | The glucose profile is an appropriate method to determine the time in range of each of the interventions.                                                                                                                              | Not             |
| 4.2 Could measurement or ascertainment of the outcome have differed between intervention groups?                                                                       | There is no mention of differences in the procedure for assessing the outcome                                                                                                                                                          | Probably not    |
| 4.3 If N/PN/NI to 4.1 and 4.2: Were outcome assessors aware of the intervention received by study participants?                                                        |                                                                                                                                                                                                                                        | Not information |
| 4.4 If Y/PY/NI to 4.3: Could assessment of the outcome have been influenced by knowledge of intervention received?                                                     |                                                                                                                                                                                                                                        | Probably not    |
| 4.5 If Y/PY/NI to 4.4: Is it likely that assessment of the outcome was influenced by knowledge of intervention received?                                               |                                                                                                                                                                                                                                        | No applicable   |
| Risk-of-bias judgement                                                                                                                                                 |                                                                                                                                                                                                                                        | Some concerns   |
| <b>Domain 5: Risk of bias in selection of the reported result</b>                                                                                                      |                                                                                                                                                                                                                                        |                 |

|                                                                                                                                                                                     |                                                                                                                                                                                                                                                                                            |       |
|-------------------------------------------------------------------------------------------------------------------------------------------------------------------------------------|--------------------------------------------------------------------------------------------------------------------------------------------------------------------------------------------------------------------------------------------------------------------------------------------|-------|
| 5.1 Were the data that produced this result analysed in accordance with a pre-specified analysis plan that was finalized before unblinded outcome data were available for analysis? | "We performed an eight-participant inpatient feasibility study, and a four-participant outpatient pilot study internal to a larger, main trial. The feasibility and main outpatient studies are registered with ClinicalTrials.gov (NCT03993366 and NCT04163874, respectively)". Pag. 2091 | Yes   |
| Is the numerical result being assessed likely to have been selected, on the basis of the results, from...                                                                           |                                                                                                                                                                                                                                                                                            |       |
| 5.2. ... multiple outcome measurements (e.g. scales, definitions, time points) within the outcome domain?                                                                           | There is no data to suggest that multiple assessments were made.                                                                                                                                                                                                                           | Not   |
| 5.3 ... multiple eligible analyses of the data?                                                                                                                                     | There is no evidence to suggest that multiple analyses were carried out.                                                                                                                                                                                                                   | Not   |
| Risk-of-bias judgement                                                                                                                                                              |                                                                                                                                                                                                                                                                                            | Low   |
| Overall risk of bias                                                                                                                                                                |                                                                                                                                                                                                                                                                                            |       |
| Risk-of-bias judgement                                                                                                                                                              |                                                                                                                                                                                                                                                                                            | Hight |
